# Supplementary material for: The incidence and risk factors of pulmonary embolism after cardiac surgery: A retrospective nationwide inpatient sample database study
Source: Research Square preprint supplement (doi:10.21203/rs.3.rs-5908873/v1), 2025-01-31
Supplement: Supplementary file 1 [file 0c23afbb62fb88c7b3b89532.docx]

**Table S3** Relationship between pulmonary embolism and preoperative comorbidities

| Comorbidities | | Univariate Analysis | | | Multivariate Logistic Regression | | | |
| --- | --- | --- | --- | --- | --- | --- | --- | --- |
| **No PE** | **PE** | **P** | | **OR** | **95% CI** | **P** |
| Preoperative comorbidities | |  |  |  | |  |  |  |
|  | **Acquired immune deficiency syndrome** | **13261(0.4%)** | **389 (0.8%)** | **＜0.001** | | **0.853** | **0.768-0.946** | **0.003** |
|  | **Alcohol abuse** | **129339 (4.2%)** | **2305 (4.9%)** | **＜0.001** | | **0.626** | **0.599-0.655** | **＜0.001** |
|  | **Chronic blood loss anemia** | **29733 (1.0%)** | **841 (1.8%)** | **＜0.001** | | **1.254** | **1.168-1.347** | **＜0.001** |
|  | **Rheumatoid arthritis/collagen vascular diseases** | **84124 (2.7%)** | **1356 (2.9%)** | **0.026** | | **0.890** | **0.841-0.940** | **＜0.001** |
|  | **Deficiency anemia** | **350951(11.4%)** | **5494 (11.8%)** | **0.016** | | **0.951** | **0.924-0.980** | **0.001** |
|  | **Drug abuse** | **105692(3.4%)** | **5158 (11.0%)** | **＜0.001** | | **2.018** | **1.951-2.088** | **＜0.001** |
|  | **Chronic pulmonary disease** | **709292(23.1%)** | **11724 (25.1%)** | **＜0.001** | | **0.855** | **0.836-0.875** | **＜0.001** |
|  | **Coagulopathy** | **361149 (11.7%)** | **10707 (22.9%)** | **＜0.001** | | **1.362** | **1.329-1.395** | **＜0.001** |
|  | **Depression** | **322725(10.5%)** | **5437(11.6%)** | **＜0.001** | | **0.844** | **0.819-0.870** | **＜0.001** |
|  | **Diabetes, uncomplicated** | **716888 (23.3%)** | **6860 (14.7%)** | **＜0.001** | | **0.621** | **0.604-0.638** | **＜0.001** |
|  | **Diabetes with chronic complications** | **438580(14.3%)** | **6234(13.4%)** | **＜0.001** | | **0.710** | **0.689-0.731** | **＜0.001** |
|  | **Congestive heart failure** | **451163 (14.7%)** | **11680 (25%)** | **＜0.001** | | **1.001** | **0.975-1.027** | **0.948** |
|  | **Hypertension** | **2169608(70.5%)** | **26989 (57.8%)** | **＜0.001** | | **0.638** | **0.624-0.651** | **＜0.001** |
|  | **Hypothyroidism** | **397182 (12.9%)** | **5076 (10.9%)** | **＜0.001** | | **0.762** | **0.739-0.786** | **＜0.001** |
|  | **Liver disease** | **160927 (5.2%)** | **4942 (10.6%)** | **＜0.001** | | **0.989** | **0.958-1.022** | **0.526** |
|  | **Lymphoma** | **37458 (1.2%)** | **818 (1.8%)** | **＜0.001** | | **1.046** | **0.974-1.123** | **0.221** |
|  | **Fluid and electrolyte disorders** | **1016055(33%)** | **24602 (52.7%)** | **＜0.001** | | **1.271** | **1.245-1.298** | **＜0.001** |
|  | **Metastatic cancer** | **66594 (2.2%)** | **4180(9.0%)** | **＜0.001** | | **2.293** | **2.203-2.387** | **＜0.001** |
|  | **Other neurological disorders** | **307821 (10.0%)** | **7631 (16.3%)** | **＜0.001** | | **1.123** | **1.094-1.153** | **＜0.001** |
|  | **Obesity** | **581371 (18.9%)** | **11074 (23.7%)** | **＜0.001** | | **1.225** | **1.196-1.254** | **＜0.001** |
|  | **Renal failure** | **653075(21.2%)** | **7844(16.8%)** | **＜0.001** | | **0.606** | **0.590-0.623** | **＜0.001** |
|  | **Peripheral vascular disorders** | **351259(11.4%)** | **4375(9.4%)** | **＜0.001** | | **0.819** | **0.793-0.846** | **＜0.001** |
|  | **Psychoses** | **101137 (3.3%)** | **2179 (4.7%)** | **＜0.001** | | **0.932** | **0.891-0.975** | **0.002** |
|  | **Pulmonary circulation disorders** | **111343(3.6%)** | **8714 (18.7%)** | **＜0.001** | | **4.339** | **4.216-4.465** | **＜0.001** |
|  | **Paralysis** | **89156 (2.9%)** | **2003 (4.3%)** | **＜0.001** | | **0.986** | **0.941-1.033** | **0.551** |
|  | **Solid tumor without metastasis** | **110221(3.6%)** | **4631 (9.9%)** | **＜0.001** | | **1.543** | **1.486-1.603** | **＜0.001** |
|  | **Peptic ulcer disease excluding bleeding** | **14644(0.5%)** | **372(0.8%)** | **＜0.001** | | **1.008** | **0.908-1.120** | **0.879** |
|  | **Valvular disease** | **204472 (6.6%)** | **7944(17.0%)** | **＜0.001** | | **1.556** | **1.512-1.600** | **＜0.001** |
|  | **Weight loss** | **260092 (8.5%)** | **8970 (19.2%)** | **＜0.001** | | **1.290** | **1.258-1.324** | **＜0.001** |

AIDS: Acquired immunodeficiency syndrome, OR: Odds ratio, CI: Confidence interval
