# Supplementary material for: The incidence and risk factors of pulmonary embolism after cardiac surgery: A retrospective nationwide inpatient sample database study
Source: Research Square preprint supplement (doi:10.21203/rs.3.rs-5908873/v1), 2025-01-31
Supplement: Supplementary file 2 [file 93f0a647e591cd50903c5cea.docx]

**Table S2** Risk factors associated with pulmonary embolism after cardiac surgery

| Variable | | Multivariate Logistic Regression | | |
| --- | --- | --- | --- | --- |
| **OR** | **95% CI** | **P** |
| Age ≥65 years old | | **0.858** | **0.847-0.869** | **＜0.001** |
| Female | | **1.123** | **1.101-1.145** | **＜0.001** |
| Race | |  |  |  |
|  | **White** | **Ref** | **——** | **——** |
|  | **Black** | **1.108** | **1.079-1.138** | **＜0.001** |
|  | **Hispanic** | **0.765** | **0.735-0.795** | **＜0.001** |
|  | **Asian or Pacific Islander** | **0.633** | **0.587-0.684** | **＜0.001** |
|  | **Native American** | **0.708** | **0.619-0.810** | **＜0.001** |
|  | **Other** | **0.899** | **0.866-0.932** | **＜0.001** |
| Number of Comorbidity | |  |  |  |
|  | **0** | **Ref** | **——** | **——** |
|  | **1** | **1.515** | **1.408-1.630** | **＜0.001** |
|  | **2** | **2.342** | **2.184-2.512** | **＜0.001** |
|  | **≥3** | **3.780** | **3.519-4.061** | **＜0.001** |
| Type of insurance | |  |  |  |
|  | **Medicare** | **Ref** | **——** | **——** |
|  | **Medicaid** | **1.162** | **1.126-1.200** | **＜0.001** |
|  | **Private insurance** | **1.043** | **1.015-1.072** | **0.003** |
|  | **Self-pay** | **1.061** | **1.011-1.114** | **0.017** |
|  | **No charge** | **1.014** | **0.876-1.174** | **0.851** |
|  | **Other** | **1.106** | **1.043-1.174** | **0.001** |
| Bed size of hospital | |  |  |  |
|  | **Small** | **Ref** | **——** | **——** |
|  | **Medium** | **1.024** | **0.991-1.057** | **0.151** |
|  | **Large** | **1.032** | **1.003-1.063** | **0.030** |
| Elective admission | | **0.465** | **0.450-0.481** | **＜0.001** |
| Teaching hospital | | **1.309** | **1.279-1.341** | **＜0.001** |
| Urban hospital | | **0.956** | **0.910-1.003** | **0.067** |
| Region of hospital | |  |  |  |
|  | **Northeast** | **Ref** | **——** | **——** |
|  | **Midwest or North Central** | **1.107** | **1.074-1.140** | **＜0.001** |
|  | **South** | **1.061** | **1.033-1.090** | **＜0.001** |
|  | **West** | **1.089** | **1.055-1.124** | **＜0.001** |

OR: Odds ratio, CI: Confidence interval
