# Supplementary material for: The incidence and risk factors of pulmonary embolism after cardiac surgery: A retrospective nationwide inpatient sample database study
Source: Research Square preprint supplement (doi:10.21203/rs.3.rs-5908873/v1), 2025-01-31
Supplement: Supplementary file 3 [file 990691f1760c901de14782ed.docx]

Table S4 Relationship between pulmonary embolism and postoperative complications

| Complications | | NO of Events | | | Multivariate Logistic Regression | | |
| --- | --- | --- | --- | --- | --- | --- | --- |
| **No PE** | **PE** | **P** | **OR** | **95% CI** | **P** |
| Medical complications | |  |  |  |  |  |  |
|  | **COPD** | **2570356** | **551963** | **＜0.001** | **1.221** | **1.188-1.256** | **＜0.001** |
|  | **Genitourinary disease** | **2249791** | **872528** | **＜0.001** | **1.130** | **1.073-1.190** | **＜0.001** |
|  | **AMI** | **2415167** | **707152** | **＜0.001** | **1.827** | **1.776-1.879** | **＜0.001** |
|  | **Acute cerebrovascular disease** | **2991950** | **130369** | **＜0.001** | **2.049** | **1.814-2.315** | **＜0.001** |
|  | **Chest pain** | **2962157** | **160162** | **＜0.001** | **1.914** | **1.791-2.047** | **＜0.001** |
|  | **DVT** | **3054002** | **68317** | **＜0.001** | **0.055** | **0.054-0.057** | **＜0.001** |
|  | **arrhythmia** | **2951240** | **171079** | **＜0.001** | **1.659** | **1.569-1.755** | **＜0.001** |
|  | **Lower limb peripheral**  **nerve injuries** | **3082754** | **39565** | **＜0.001** | **1.408** | **1.256-1.578** | **＜0.001** |
| Heart failure | | **2427924** | **694395** | **＜0.001** | **1.108** | **1.082-1.135** | **＜0.001** |
|  | **respiratory**  **failure** | **2920643** | **201676** | **＜0.001** | **0.836** | **0.811-0.863** | **＜0.001** |
|  | **aspiration pneumonia** | **2788661** | **333658** | **＜0.001** | **0.555** | **0.541-0.568** | **＜0.001** |
|  | **Acute renal failure** | **2396713** | **725606** | **＜0.001** | **0.787** | **0.747-0.830** | **＜0.001** |

OR: Odds ratio, CI: Confidence interval
