# Supplementary material for: The incidence and risk factors of pulmonary embolism after cardiac surgery: A retrospective nationwide inpatient sample database study
Source: Research Square preprint supplement (doi:10.21203/rs.3.rs-5908873/v1), 2025-01-31
Supplement: Supplementary file 4 [file 9d737fdc13635ab81b5942aa.docx]

**Supplemental Digital Content 1 – ICD-9 and ICD-10 codes**

**CARDIOVASCULAR SURGERY:**

- DOI: [10.1016/j.heliyon.2024.e24902](https://doi.org/10.1016/j.heliyon.2024.e24902" \t "https://pubmed.ncbi.nlm.nih.gov/38317919/_blank)

| **Type of surgery** | **ICD-9** | **ICD-10** |
| --- | --- | --- |
| **Coronary Artery Bypass Grafting** | **"361"**  ***Means anything starting with"361"*** | **"210083","210088","210089","021008C","021008F","021008W","210093","210098","210099","021009C","021009F","021009W","02100A3","02100A8","02100A9","02100AC","02100AF","02100AW","02100J3","02100J8","02100J9","02100JC","02100JF","02100JW","02100K3","02100K8","02100K9","02100KC","02100KF","02100KW","02100Z3","02100Z8","02100Z9","02100ZC","02100ZF","02110Z9","211083","211088","211089","021108C","021108F","021108W","211093","211098","211099","021109C","021109F","021109W","02110A3","02110A8","02110A9","02110AC","02110AF","02110AW","02110J3","02110J8","02110J9","02110JC","02110JF","02110JW","02110K3","02110K8","02110K9","02110KC","02110KF","02110KW","02110Z3","02110Z8","02110ZC","02110ZF","212083","212088",**  **"212089","021208C","021208F","021208W","212093","212098","212099","021209C","021209F","021209W","02120A3","02120A8","02120A9","02120AC","02120AF","02120AW","02120J3","02120J8","02120J9","02120JC","02120JF","02120JW","02120K3","02120K8","02120K9","02120KC","02120KF","02120KW","02120Z3","02120Z8","02120Z9","02120ZC","02120ZF","213083","213088","213089","021308C","021308F","021308W","213093","213098","213099","021309C","021309F","021309W","02130A3","02130A8","02130A9","02130AC","02130AF","02130AW","02130J3","02130J8","02130J9","02130JC","02130JF","02130JW","02130K3","02130K8","02130K9","02130KC","02130KF","02130KW","02130Z3","02130Z8","02130Z9", ,"02130ZF","021K0Z5","021L0Z5","02540ZZ","270046","027004Z","270056","027005Z","270066","027006Z","270076","027007Z","02700D6","02700DZ","2.70E+09","02700EZ","02700F6","02700FZ","02700G6","02700GZ","02700T6","02700TZ","02700Z6","02700ZZ","271046","027104Z","271056","027105Z","271066","027106Z","271076","027107Z","02710D6","02710DZ","2.71E+09","02710EZ","02710F6","02710FZ","02710G6","02710GZ","02710T6","02710TZ","02710Z6","02710ZZ","272046","027204Z","272056",**  **"027205Z","272066","027206Z","272076","027207Z","02720D6","02720DZ","2.72E+09","02720EZ","02720F6","02720FZ","02720G6","02720GZ","02720T6","02720TZ","02720Z6","02720ZZ","273046","027304Z","273056","027305Z","273066","027306Z","027307Z","02730D6","02730DZ","2.73E+09","02730EZ","02730F6","02730FZ","02730G6","02730GZ","02730T6","02730TZ","02730Z6","02730ZZ","02B40ZX","02B40ZZ","02C00Z6","02C00ZZ","02C10Z6","02C10ZZ","02C20Z6","02C20ZZ","02C30Z6","02C30ZZ","02C40ZZ","02H400Z","02H402Z","02H403Z","02H40DZ","02H40JZ","02H40KZ","02H40MZ","02H40YZ","02N00ZZ","02N10ZZ","02N20ZZ","02N30ZZ","02N40ZZ","02Q00ZZ","02Q10ZZ","02Q20ZZ","02Q30ZZ","02Q40ZZ","02S10ZZ","02S00ZZ","3E07016","3E07017","3E070GC","3E070KZ","3E070PZ"** |
| **Aortic valve surgery** | **"3511","3521","3522"** | **"024F07J","024F08J","024F0JJ","024F0KJ","027F04Z","027F0DZ",**  **"02QF0ZJ","02RF07Z","02RF08Z","02RF0JZ","02RF0KZ","02UF07J",**  **"02UF07Z","02UF08J","02UF08Z","02UF0JJ","02UF0JZ","02UF0KJ",**  **"02UF0KZ","X2RF032"** |
| **Mitral valve surgery** | **"3512","3523","3524"** | **"024G072","024G082","024G0J2","024G0K2","025G0ZZ","027G04Z",**  **"027G0DZ","027G0ZZ","02BG0ZX","02BG0ZZ","02CG0ZZ","02NG0ZZ","02QG0ZE","02QG0ZZ","02RG07Z","02RG08Z","02RG0JZ","02RG0KZ","02UG07E","02UG07Z","02UG08E","02UG08Z","02UG0JE","02UG0JZ","02UG0KE","02UG0KZ","02VG0ZZ","02WG07Z","02WG08Z","02WG0JZ",**  **"02WG0KZ"** |
| **Tricuspid valve surgery** | **"3514","3527","3528"** | **"024J072","024J082","024J0J2","024J0K2","027J04Z","027J0DZ",**  **"02QJ0ZG","02RJ07Z","02RJ08Z","02RJ0JZ","02RJ0KZ","02UJ07G",**  **"02UJ07Z","02UJ08G","02UJ08Z","02UJ0JG","02UJ0JZ","02UJ0KG",**  **"02UJ0KZ"** |
| **Pulmonary valve surgery** | **"3513","3525","3526"** | **"027H04Z","027H0DZ","02LH0CZ","02LH0DZ","02RH07Z","02RH08Z","02RH0JZ","02RH0KZ","02UH07Z","02UH08Z","02UH0JZ","02UH0KZ"** |

帮我把这段(CHAR.INDEX(CONCAT(RTRIM(Vars(#i)), " "), "457") = 1) +里面的457分别替换成**"027H04Z","027H0DZ","02LH0CZ","02LH0DZ","02RH07Z","02RH08Z","02RH0JZ","02RH0KZ","02UH07Z","02UH08Z","02UH0JZ","02UH0KZ"，**要求保留最后面的加号。
